# Supplementary material
Source: publisher site journal article supplement (https://www.dovepress.com/get_supplementary_file.php?f=296730.xlsx)
Supplement: Supplementary file 1 [file get_supplementary_file.php]

## Sheet: Conversion
Supplemental Table: Conversion of CLIA intensity to expected titer concentrations.
BC Intensity	Expected Titer Concentration	Lower 95%	Upper 95%
0	133.615	104.16	171.398
1	270.719	195.682	374.529
2	362.696	254.087	517.729
3	453.954	310.471	663.746
4	548.507	367.62	818.399
5	648.001	426.625	984.25
6	753.398	488.08	1162.94
7	865.388	552.379	1355.76
8	984.535	619.816	1563.86
9	1111.34	690.634	1788.32
10	1246.27	765.046	2030.18
15	2058.54	1197.6	3538.38
20	3142.66	1747.39	5652.03
25	4562.2	2437.5	8538.92
30	6390.31	3293.31	12399.7
35	8711.7	4343.23	17474
50	19692.3	8997.14	43101
60	31714.9	13769.7	73046.9
70	49157.5	20365	118657

## Sheet: Model
Parameter Estimates
Variable	DF	Parameter	Standard	t Value	Pr > |t|	95% Confidence Limits
		Estimate	Error
Intercept	1	4.89496	0.12611	38.82	<.0001	4.64593	5.14399
root_intensity	1	0.70612	0.03826	18.45	<.0001	0.63056	0.78168

## Sheet: Sheet2
b0	b1	x	exp				b0	b1	x	exp		b0	b1	x	exp
4.89496	0.70612	0	133.615				4.64593	0.63056	0	104.16		5.14399	0.78168	0	171.398
4.89496	0.70612	1	270.719				4.64593	0.63056	1	195.682		5.14399	0.78168	1	374.529
4.89496	0.70612	2	362.696				4.64593	0.63056	2	254.087		5.14399	0.78168	2	517.729
4.89496	0.70612	3	453.954				4.64593	0.63056	3	310.471		5.14399	0.78168	3	663.746
4.89496	0.70612	4	548.507				4.64593	0.63056	4	367.62		5.14399	0.78168	4	818.399
4.89496	0.70612	5	648.001				4.64593	0.63056	5	426.625		5.14399	0.78168	5	984.25
4.89496	0.70612	6	753.398				4.64593	0.63056	6	488.08		5.14399	0.78168	6	1162.94
4.89496	0.70612	7	865.388				4.64593	0.63056	7	552.379		5.14399	0.78168	7	1355.76
4.89496	0.70612	8	984.535				4.64593	0.63056	8	619.816		5.14399	0.78168	8	1563.86
4.89496	0.70612	9	1111.34				4.64593	0.63056	9	690.634		5.14399	0.78168	9	1788.32
4.89496	0.70612	10	1246.27				4.64593	0.63056	10	765.046		5.14399	0.78168	10	2030.18
4.89496	0.70612	11	1389.77				4.64593	0.63056	11	843.248		5.14399	0.78168	11	2290.51
4.89496	0.70612	12	1542.3				4.64593	0.63056	12	925.426		5.14399	0.78168	12	2570.38
4.89496	0.70612	13	1704.3				4.64593	0.63056	13	1011.76		5.14399	0.78168	13	2870.89
4.89496	0.70612	14	1876.23				4.64593	0.63056	14	1102.43		5.14399	0.78168	14	3193.17
